# Supplementary figures and images for: Smad7 Deficiency in Myeloid Cells Does Not Affect Liver Injury, Inflammation or Fibrosis after Chronic CCl4 Exposure in Mice
Source: MDPI journal article supplement (doi:10.3390/ijms222111575), 2021-10-27

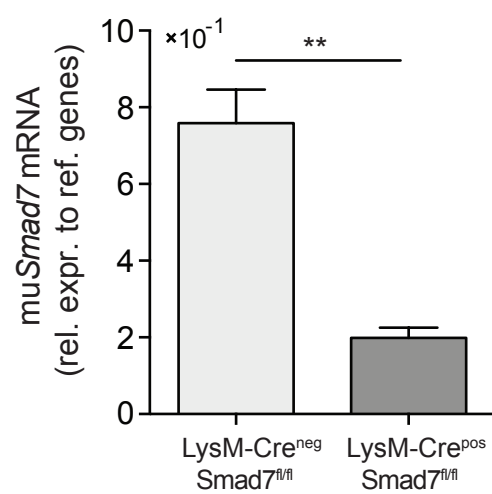

Supplement: s1 [file s1]
